# Supplementary material for: Real-time coastal flood hazard assessment using DEM-based hydrogeomorphic classifiers
Source: Copernicus journal article supplement (doi:10.5194/nhess-2021-359), 2021-12-09
Supplement: Supplementary file 1 [file nhess-2021-359-supplement.pdf]

# 1 Supplementary Material

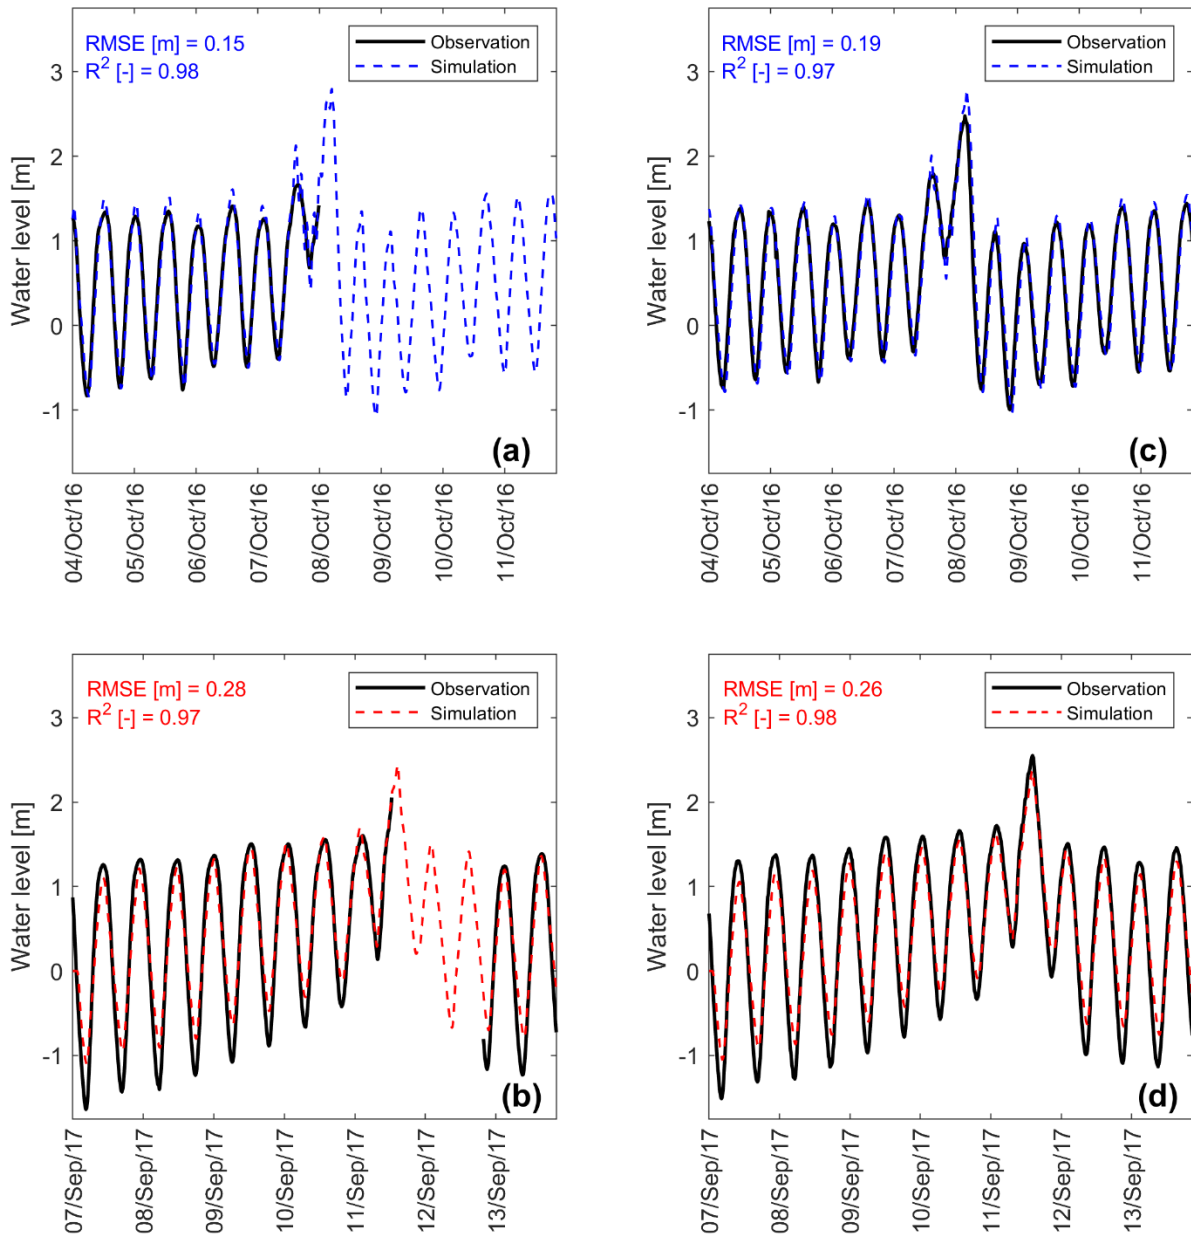

2

3 **Figure S1.** Calibration and validation of the Savannah Delft3D-FM model. Time series of  
4 simulated and observed WLS at (a, b) Port Wentworth and (c, d) Savannah River at USACE dock.

5 Top and bottom panel show times series of Hurricane Matthew and Irma, respectively. Note that  
6 the model can simulate water level variability, and so fill the data gaps observed during Hurricane  
7 Matthew.
