# Supplementary material for: Real-time coastal flood hazard assessment using DEM-based hydrogeomorphic classifiers
Source: Copernicus journal article supplement (doi:10.5194/nhess-2021-359), 2021-12-09
Supplement: Supplementary file [file nhess-2021-359-RC1-supplement.pdf]

# Real-time coastal flood hazard assessment using DEM-based hydrogeomorphic classifiers

Keighobad Jafarzadegan<sup>1</sup>, David F. Muñoz<sup>1</sup>, Hamed Moftakhari<sup>1</sup>, Joseph L Gutenson<sup>2</sup>,  
Gaurav Savant<sup>2</sup>, Hamid Moradkhani<sup>1</sup>

<sup>1</sup> Center for Complex Hydrosystems Research, Department of Civil, Construction, and  
Environmental Engineering, University of Alabama, Tuscaloosa, AL

<sup>2</sup> US Army Engineer Research and Development Center, Coastal and Hydraulics Laboratory,  
Vicksburg, MS, USA

*Correspondence to:* Keighobad Jafarzadegan [kjafarzadegan@ua.edu](mailto:kjafarzadegan@ua.edu)

## **Key Points**

- A DEM-based approach is developed for rapid flood hazard assessment in coastal regions.
- The Height Above Nearest Drainage (HAND) is modified for flood mapping in flat areas.
- Operative hydrogeomorphic curves are proposed for real-time flood hazard mapping.

## Abstract

Deltas, estuaries, and wetlands are prone to frequent coastal flooding throughout the world. ~~In addition,~~ a large number of people in the United States have settled in these low-lying regions. Therefore, the ecological merit of wetlands for maintaining sustainable ecosystems highlights the importance of flood risk and hazard management in these regions. Typically, hydrodynamic models are used for coastal flood hazard mapping. The huge computational resources required for hydrodynamic modeling and the long-running time of these models (order of hours or days) are two major drawbacks that limit the application of these models for prompt decision-making by emergency responders. In the last decade, DEM-based classifiers based on Height Above Nearest Drainage (HAND) have been widely used for rapid flood hazard assessment demonstrating satisfactory performance for inland floods. The main limitation is the high sensitivity of HAND to the topography which degrades the accuracy of these methods in flat coastal regions. In addition, these methods are mostly used for a given return period and generate static hazard maps for past flood events. To cope with these two limitations, here we modify HAND and propose a composite hydrogeomorphic index for rapid flood hazard assessment in coastal areas. We also propose the development of hydrogeomorphic threshold operative curves for real-time flood hazard mapping. We select the Savannah river delta as a testbed, calibrate the proposed hydrogeomorphic index on Hurricane Matthew and validate the performance of the developed operative curves for Hurricane Irma. Validation results demonstrate that the operative curves can rapidly generate flood hazard maps with satisfactory accuracy. This indicates the high efficiency of our proposed methodology for fast and accurate estimation of hazard areas for an upcoming coastal flood event which can be beneficial for emergency responders and flood risk managers.

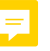

## 1. Introduction

Densely populated coastal areas are some of the most productive ecosystems on Earth. Coastal wetlands provide important services to society, including flood attenuation, water storage, carbon sequestration, nutrient cycling, pollutant removal, and wildlife habitat (Barbier, 2019; Land et al., 2019; Wamsley et al., 2010). Characterizing the hydrological processes unique to coastal areas is tremendously important for ensuring the sustainability of these ecosystem services. Endangered coastal ecosystems are threatened by anthropogenic effects including direct impacts of human activities (i.e. urbanization and navigational development) or indirect impacts (e.g. sea level rise (SLR), and hydroclimate extremes exacerbated by climate change (Alizad et al., 2018; Kirwan and Megonigal, 2013; Wu et al., 2017). Nearly 70% of global wetlands have been lost since the 1900s and rates of wetland loss have increased by a factor of 4 in the late 20<sup>th</sup> and early 21<sup>st</sup> century (Davidson, 2014). Urbanization hinders wetland migration toward upland areas in an effort to cope with rising water levels (WLs) (Schieder et al., 2018). Likewise, moderate to high Relative Sea Level Rise (RSLR) rates can influence the fate of sediments and nutrient availability to coastal wetlands (Schile et al., 2014); and eventually transform low marsh regions into open water or mudflat areas (Alizad et al., 2018). SLR and navigational development can alter the tidal regime and long-wave propagation characteristics inside estuaries/bays and so change the flooding inundation patterns (Familkhalili et al., 2020; Khojasteh et al., 2021a, b). Similarly, hurricane impacts can create interior ponds, trigger shoreline erosion, and denude marshes (Morton and Barras, 2011). People and assets located in low-lying coastal regions and river deltas are frequently exposed to compound flooding. Challenges for flood hazard assessment unique to these systems include compounding effects of multiple flooding mechanisms, complex drainage systems with relatively low slopes, and periodically saturated soils. it is expected that between 0.2-4.6% of the

global population may be exposed to coastal flooding if no strategic adaptation takes place (Kulp and Strauss, 2019).

Efficient flood risk reduction strategies require accurate real-time assessment of flooding hazards (Gutenson, 2020; USGS Surface Water Information, 2021). In order to simulate the coastal flood hazard in wetlands, two-dimensional (2D) hydrodynamic models are commonly used for flood inundation mapping, as they allow for simulating complex oceanic, hydrological, meteorological, and anthropogenic processes based on process-based numerical schemes. The advanced circulation model (ADCIRC) (Luettich et al., 1992), DELFT3D (Roelvink and Banning, 1995), and LISFLOOD-FP (Bates et al., 2010) are among the most commonly used 2D hydrodynamic models for coastal flood hazard assessment in low-lying areas at local and regional scales (Bates et al., 2021; Muis et al., 2019; Thomas et al., 2019). Nonetheless, hydrodynamic modeling approaches require huge computational resources to conduct flood hazard assessments at a large scale. This is even more challenging when emergency responders need timely flood risk information at a desirable accuracy and resolution on a real-time basis. Therefore, while 2D hydrodynamic models are still a key component in many frameworks for detailed analyses of the flood hazard, the use of low-complexity flood mapping (LCFM) methods is essential for the preliminary estimation of areas exposed to flooding in a short time. Applying LCFM methods together with detailed hydrodynamic models provide a more comprehensive set of information for emergency responders and improve the efficiency of flood risk management in practice.

The advent of Digital Elevation Models (DEMs) has led to the development of a series of GIS-based LCFM methods for rapid estimation of flood hazard in the last couple of decades (Afshari et al., 2018; Dodov and Foufoula-Georgiou, 2006; Manfreda et al., 2011; McGlynn and McDonnell, 2003; McGlynn and Seibert, 2003; Nardi et al., 2006; Samela et al., 2016; Teng et al.,

2015; Williams et al., 2000). Among these methods, binary classification of a hydrogeomorphic raster has been shown to be an efficient approach for reliable delineation of floodplains (Degiorgis et al., 2012; Manfreda et al., 2014). In a binary hydrogeomorphic classification approach, the study area is examined as a grid of cells, then a threshold of a hydrogeomorphic feature, typically calculated from a DEM, is chosen. Comparing the hydrogeomorphic feature value of cells with the threshold, the entire study area is classified into flooded and non-flooded cells.

The Federal Emergency Management Agency (FEMA) provides flood hazard maps across the United States. These maps, also referred to as Flood Insurance Rate Maps (FIRMs) identify flood-prone areas corresponding to specific return periods. While these hazard maps provide useful information for a few recurrence intervals, they are no longer reliable for extreme flood events characterized by lower frequencies or longer return periods. In 2015, the National Water Center Innovators Program initiated the national flood interoperability experiment (NFIE) for real-time flood inundation mapping across the United States (Maidment, 2017; Maidment et al., 2014). The plan highlighted the tendency for event-based flood mapping which is more valuable and practical for emergency response and warning systems. Unlike past DEM-based methods that mostly focused on flood hazard mapping, Zheng et al., (2018b) proposed the development of DEM-based synthetic rating curves for real-time flood inundation mapping. In most current, real-time flood mapping methods, the forecasted river flows and/or water surface elevation are typically fed into flood inundation libraries to simulate the upcoming flood inundation areas (IWRSS, 2015, 2013; Maidment, 2017; Wing et al., 2019; Zheng et al., 2018a). The computationally intensive and time-consuming nature of detailed hydrodynamic models to numerically route flood waves typically restricts their usage in supporting emergency response activities (Gutenson et al., 2021; Longenecker et al., 2020).

An LCFM method based on Height Above Nearest Drainage (HAND) has been widely used and recognized as one of the best classifiers for identifying flood hazard areas (Degiorgis et al., 2012; Jafarzadegan et al., 2018; Jafarzadegan and Merwade, 2019; McGrath et al., 2018; Samela et al., 2017; Zheng et al., 2018a). The performance assessment of HAND classifiers in different topographic settings suggests, despite an acceptable performance in most locations, the accuracy of hazard maps is significantly lower in low-lying coastal regions (Jafarzadegan and Merwade, 2017) and Samela et al., 2017)). While the majority of DEM-based flood hazard mapping methods have been developed and tested for inland floods, access to an appropriate DEM-based method for coastal flooding is lacking in the literature. Since coastal flooding occurs rapidly and the time for hydrodynamic modeling and designing flood mitigation strategies is limited, especially in data-scarce regions, efficient DEM-based approaches can be significantly beneficial for emergency and response-related decision-makers.

The overarching goal of this study is to propose a DEM-based LCFM method for coastal wetlands, estuaries, and deltas. To our knowledge, this is the first study that investigates the application of hydrogeomorphic binary classifiers for flooding in semi-flat coastal zones. We modify the HAND commonly used for riverine inland flooding (Degiorgis et al., 2013; Jafarzadegan et al., 2020; Samela et al., 2017) and propose a composite hydrogeomorphic index for tidally-influenced coastal regions. We enhance the applicability of the proposed method by developing hydrogeomorphic threshold operative curves for coastal flood hazard mapping. Unlike previous studies that rely on binary classifiers for specific return periods, the operative curves here offer a unique opportunity for rapid assessment of hazardous areas in real-time. These curves have substantial benefits for emergency responders when wetlands are prone to coastal flooding.

## 2. Study area and data

We study the Savannah River delta located in the Southeast United States, Georgia (Figure 1a). The morphology of this region is relatively complex due to the existence of a braided river followed by a dense drainage network of interior rivers and tidal creeks. This region is mostly characterized by its unique ecology including vast wetlands and saltmarsh ecosystems.

To simulate the flood hazard in this region, a mesh boundary encompassing the Savannah River delta, surrounding areas, and a portion of the Atlantic Ocean is generated (Figure 1b). Two U.S. Geological Survey (USGS) gauges, located at the Savannah River (#02198500, #02198690) and the Fort Pulaski station of the National Oceanic and Atmospheric Administration (NOAA) are used as upstream and downstream boundary conditions of the hydrodynamic model, respectively. Fort Pulaski station (NOAA – 8670870) counts with an 85-year length of records (since 1935) that enables a proper characterization of coastal flooding for design levels at lower frequencies or relatively large return periods. We select this region as a testbed because of 1) frequent coastal flooding induced by large semidiurnal tidal amplitudes at the estuary mouth (Cowardin et al., 2013) and 2) exposure of more than twenty thousand people settled in four developed areas, the Whitemarsh, Talahi, Wilmington, and Tybee Islands located in this region (Figure 1c).

The high-resolution DEM used as the base of our proposed hydrogeomorphic index is a 3 m light detection and ranging (LiDAR) that includes topographic and bathymetric (topobathy) data. This dataset has been developed by the NOAA's National Centers for Environmental Information (NCEI) and is available at the NOAA's Data Access Viewer repository (<https://coast.noaa.gov/dataviewer/>). The topobathy data was further corrected for wetland elevation error using the DEM-correction tool developed by Muñoz et al., (2019) ~~in order to~~ minimize vertical bias errors commonly found in LiDAR-derived coastal DEMs (Alizad et al.,

2018; Medeiros et al., 2015; Rogers et al., 2018). The vertical and horizontal accuracy of the DEM are 50 and 100 cm, respectively and its vertical datum is the North American Vertical Datum 1988 (NAVD88). Land cover maps are obtained from the 2016 National Land Cover Database (NLCD) available at (<https://www.mrlc.gov/>). River discharge and WL records are obtained from the USGS (<https://maps.waterdata.usgs.gov/mapper/index.html>) and NOAA (<https://tidesandcurrents.noaa.gov/>), respectively. In addition, post-flood high water marks (HWMs) of Hurricane Irma and Matthew are obtained from the USGS Flood Event Viewer platform (<https://stn.wim.usgs.gov/FEV/>). These high-water marks are used for calibration and validation of the Savannah model in Delft3D-FM.



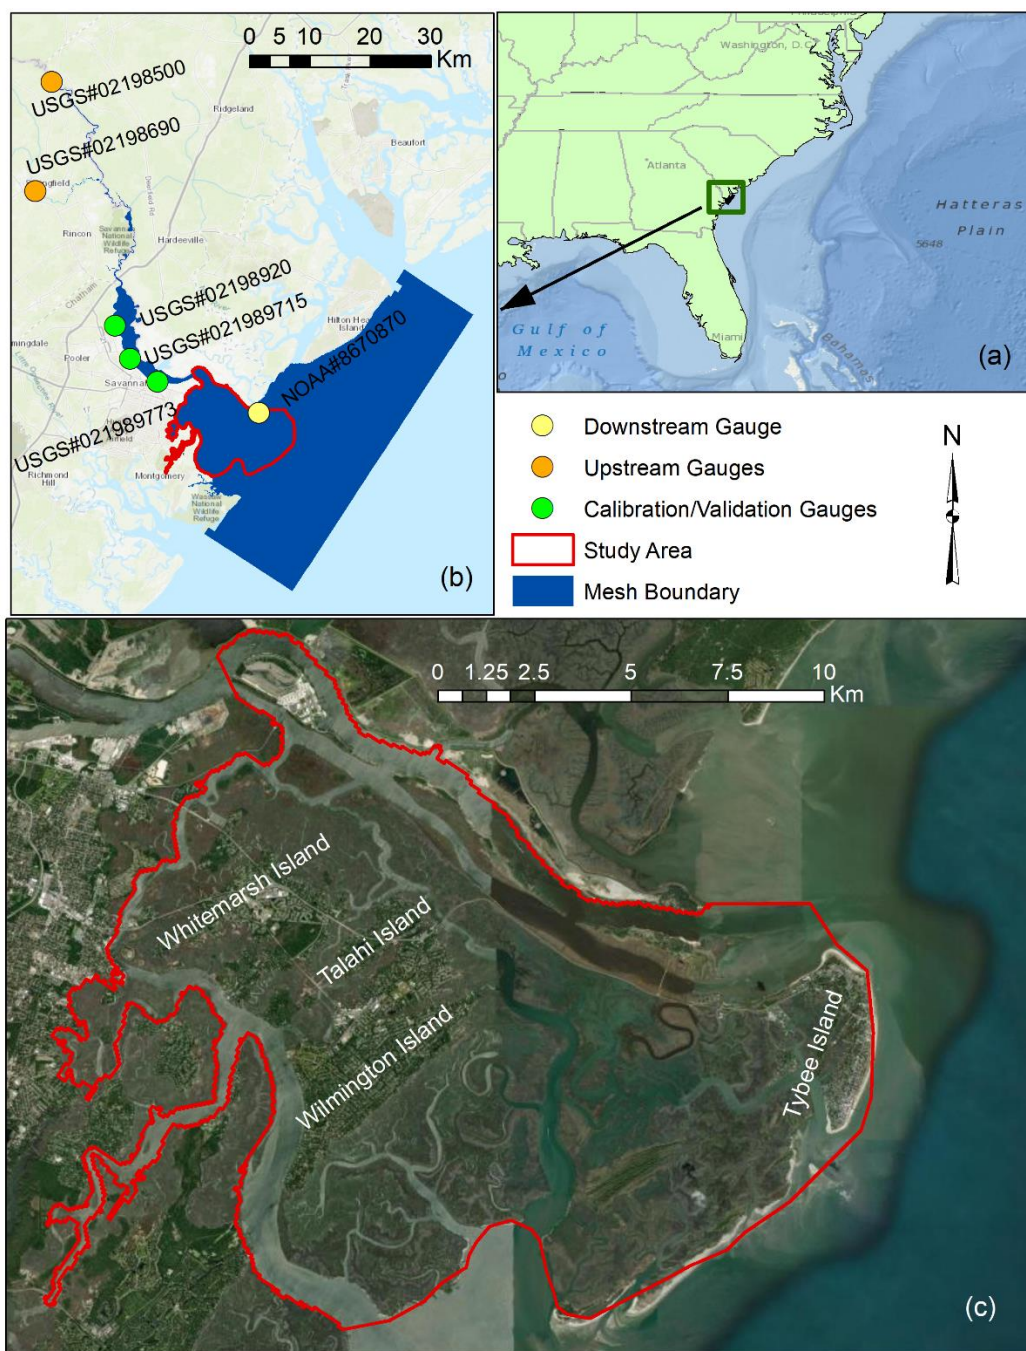

172 **Figure 1.** Map of the study area and mesh boundary of the hydrodynamic model. (a) the geographic  
 173 location of the study area in the southeast U.S., (b) The mesh boundary used by the hydrodynamic  
 174 model (blue) for flood inundation mapping as well as the location of upstream (orange),

downstream (yellow), and calibration/validation (green) gauges, and (c) the boundary of Savannah wetlands used as the case study along with urbanized areas.

### 3. Methods

We propose a DEM-based LCFM approach for the rapid assessment of flood hazard areas in real-time. The proposed approach consists of two phases (Figure 2). In phase 1, a 2D hydrodynamic model is calibrated based on observed WLs at USGS gauges and HWMs that are available during Hurricane Matthew in 2017. We then use the calibrated hydrodynamic model to generate a flood inundation map that serves as a reference map in the next phase. In addition, for flood frequency analysis, we perform block maxima sampling approach to select the annual WL maxima at Fort Pulaski station. The selected samples are then used to estimate return levels for six return periods of 10, 50, 100, 200, 500, and 1000 year floods. Using these estimated WLs as the main boundary conditions of the hydrodynamic model, we also generate six flood inundation maps corresponding to these return periods. In phase 2, we use a high-resolution DEM together with the drainage network data to calculate the hydrogeomorphic index. Subsequently, the flood inundation map generated for Hurricane Matthew in phase 1, is used as a reference map to calibrate the hydrogeomorphic index. Then, the calibrated index uses the flood inundation maps provided for different return periods in phase 1 to develop the operative curves. These curves form the basis for the rapid assessment of flood hazard areas for any upcoming coastal flood event in the future. To validate the effectiveness and reliability of the developed operative curves, we use them to identify hazard areas corresponding to Hurricane Irma, and then we compare their accuracy with the reference map provided by the hydrodynamic model for this flood event. In the following sections, we further explain the hydrodynamic model, flood frequency analysis, and hydrogeomorphic method, respectively.

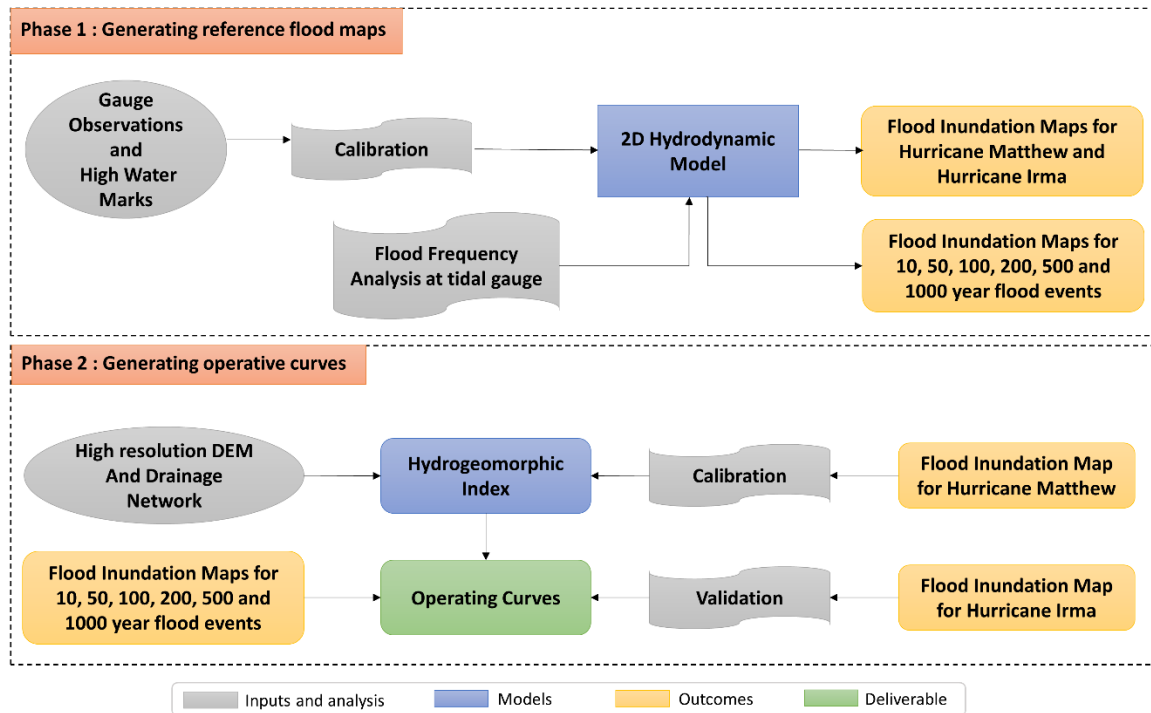

199

200 **Figure 2.** Flowchart of the proposed approach for generating hydrogeomorphic threshold  
 201 operative curves. In Phase 1, the 2D hydrodynamic model is calibrated and generates the required  
 202 reference maps for the next phase. In Phase 2, the reference maps are used in conjunction with the  
 203 hydrogeomorphic index to generate the operative curves for fast and real-time coastal flood hazard  
 204 assessment.

### 205 3.1 Hydrodynamic Model

#### 206 3.1.1 Model setup

207 We use the 2019 Delft3D-FM suite package (Deltares, 2019) to model the complex riverine,  
 208 estuarine, and intertidal flat hydrodynamics in the Savannah River delta and wetland regions. The  
 209 suite package has been used in similar coastal studies characterized by vast wetland regions with  
 210 satisfactory results (Fagherazzi et al., 2014; Kumbier et al., 2018; Sullivan et al., 2019). Moreover,  
 211 the model developed for Savannah has been used in other studies to simulate extreme and non-  
 212 extreme events including Hurricane Matthew that hit the southeast Atlantic Coast in October 2016

(Muñoz et al., 2021, 2020). The 2D hydrodynamic model comprises nearly 85 km of the Savannah River extending from Fort Pulaski station (NOAA – 8670870) at the coast up to Clyo station (USGS – 02198500). The model consists of an unstructured triangular mesh to ensure a correct representation of geomorphological settings including sinuous and braided river waterways and relatively narrow tidal inlets. Furthermore, the mesh has a spatially varying cell size ranging from 1.5 m in the upstream riverine area, 10 m over wetland regions, 120 m along the coast, and up to 1.4 km over the Atlantic Ocean (Figure 1b).

### 3.1.2 Model calibration

For calibration purposes, the model was forced with time series of river flow obtained from Clyo station as an upstream boundary condition (BC), coastal WL from Fort Pulaski station as a downstream BC, and with spatially varying Manning’s roughness values ( $n$ ) classified into open water, wetland, urban, and riverine areas. The optimal (or calibrated) set of  $n$ -values were inferred from 200 model simulations of Hurricane Matthew, as this event reported the highest peak WL at Fort Pulaski station since the year 1935 (2.59 m w.r.t. NAVD88). Each simulation was conducted in a high-performance computing system and included a one-month warm-up period and a unique set of  $n$ -values generated with the Latin Hypercube Sampling (LHS) technique (Helton and Davis, 2003). The range of  $n$ -values was derived from pertinent literature and included hydrodynamic modeling and open channel flow studies (Arcement and Schneider, 1989; Chow Ven, 1959; Liu et al., 2019). The set of values achieving both the lowest Root Mean Square Error (RMSE) and highest correlation coefficient ( $R^2$ ) around the peak WL (e.g., 7-day window) was selected as the optimal one and further used for coastal flood simulations. The calibrated  $n$ -values used in this Savannah model are: open water ( $n = 0.027$ ), wetland ( $n = 0.221$ ), urban ( $n = 0.03$ ), and downstream/upstream riverine areas ( $n = 0.037$  and  $n = 0.086$ , respectively)

## 3.2 Flood Frequency Analysis

Preliminary model simulations indicate a negligible influence of river flow on coastal wetland inundation as compared to storm surge at Wassaw Sound, Wilmington, and Tybee islands (Figure 1c). This can be explained by the proximity of the islands to the Atlantic Ocean as well as freshwater runoff regulation and flood controls by three large dams located upstream of the Clyo station (USGS – 02198500), namely J. Strom Thurmond, Richard B. Russell, and Hartwell (Zurqani et al., 2018). We, therefore, conduct a univariate flood frequency analysis based on annual block maxima sampling of WLS observed at the Fort Pulaski station (NOAA – 8670870). We use the ‘*allfitdist*’ tool in MATLAB to find the best parametric probability distribution fit to the data, based on Maximum Likelihood, Bayesian information criterion (BIC), or Akaike information criterion (AIC).

## 3.3 Hydrogeomorphic index

Among different hydrogeomorphic features used for flood hazard mapping, HAND (sometimes also referred to as feature  $H$ ) has been widely used as one of the best indicators of floodplains. However, due to the weakness of this feature for proper characterization of floodplains in flat regions and coastal areas, here we develop a composite hydrogeomorphic index that considers  $H$  as well as the distance to the nearest drainage ( $D$ ). Although the overall performance of feature  $D$  is less than  $H$  in most case studies (Degiorgis et al., 2012; Manfreda et al., 2015a; Samela et al., 2016), feature  $D$  can be a better descriptor of floodplains in highly flat regions according to the study conducted by Samela et al., (2017). In another study, Gharari et al., (2011) proposed a composite index by multiplying both features  $H$  and  $D$  and demonstrated that  $H$  is a better feature compared to the case that both features are used for landscape classification. The main drawback of their proposed index was that they used the same weights for both features which result in

degrading the classification performance. To overcome the limitation of the proposed index and to consider the key role of feature  $D$  in flat areas, we maintain feature  $D$  in our composite index and add different weights to  $H$  and  $D$  using Eq. 1 as follows:

$$I_{HD} = \left(\frac{H}{H_{max}}\right)^{w1} \times \left(\frac{D}{D_{max}}\right)^{w2} \quad \text{where} \quad w1 + w2 = 1 \quad (1)$$

In Eq.1,  $H_{max}$  and  $D_{max}$  denote the maximum value of raster  $H$  and  $D$  used for normalizing the hydrogeomorphic index whereas  $w1$  and  $w2$  refer to the weights of feature  $H$  and  $D$ , respectively. The conditional equation of  $w1 + w2 = 1$  helps lower the computational burden of the calibration procedure by reducing the number of unknown parameters from two to one. Figure 3 illustrates an example of calculating the  $I_{HD}$  index with a given set of weights ( $w1=0.6$  and  $w2=0.4$ ) for the study area. Using a high-resolution coastal DEM (Figure 3a), raster  $H$  and  $D$  are calculated (Figures 3b and 3c). Considering a DEM with  $N$  cells, the main step is to find a coordinate matrix that indicates the location of the nearest stream cell to each grid cell. Knowing this matrix and the number of cells required to cross the nearest stream cell, the feature  $D$  is calculated. The coordinate matrix can also be used in conjunction with the DEM to calculate the feature  $H$ . In order to calculate the hydrogeomorphic index  $I_{HD}$ , the weights in Eq. 1 are calibrated using a reference flood hazard map obtained from hydrodynamic simulation (e.g., Hurricane Matthew). We test different combinations of weight parameters ( $w1$  and  $w2$ ) to find the importance of features  $H$  and  $D$ , and then finalize the hydrogeomorphic index with known parameters for future flood hazard mapping. We further validate the weight parameters with simulations of Hurricane Irma.



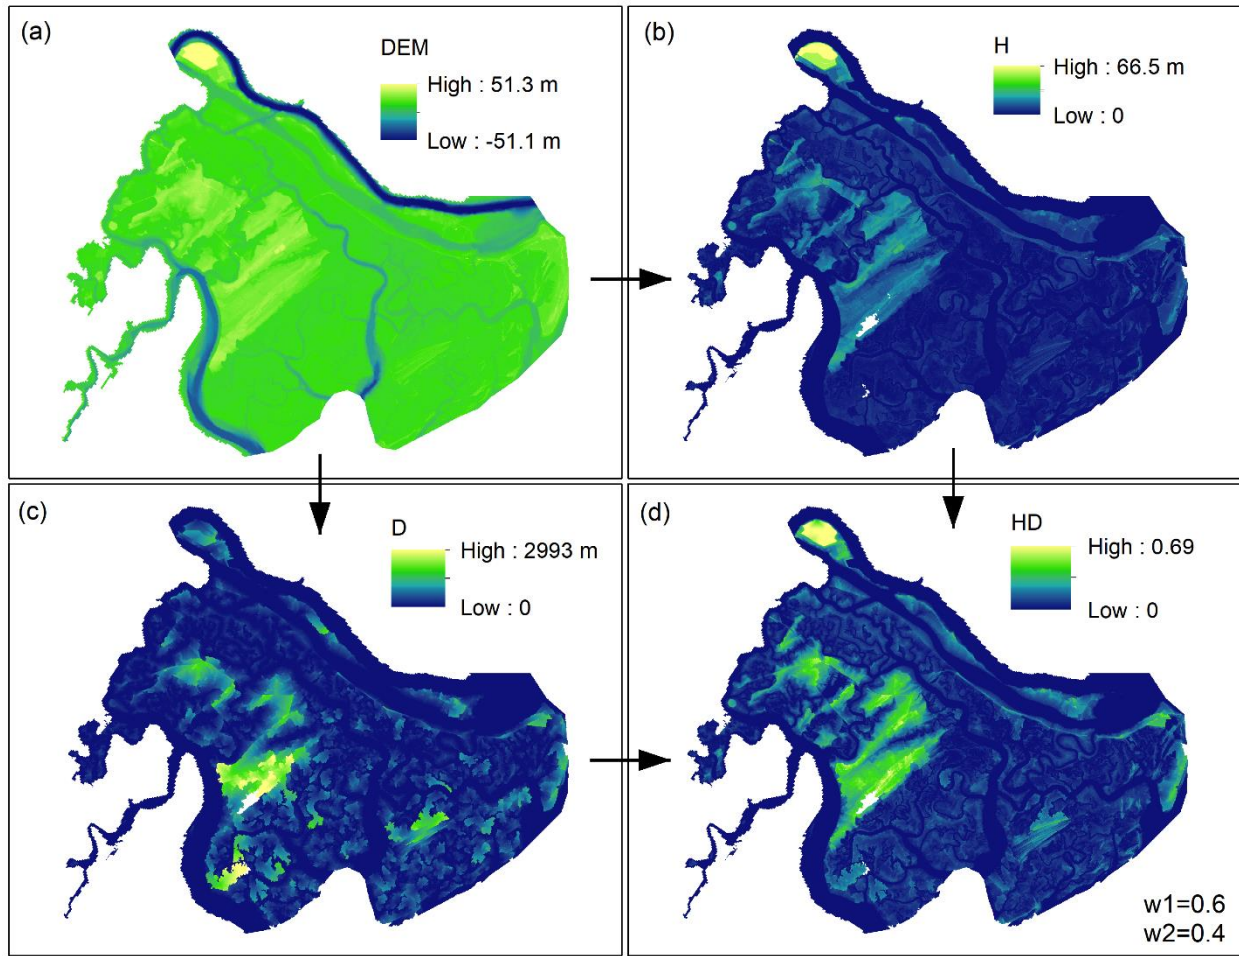

281

282 **Figure 3.** The required steps for calculating the proposed hydrogeomorphic index. A high-  
 283 resolution coastal DEM (3 m) is used as the source data to (a) generate the Height Above nearest  
 284 Drainage ( $H$ ) and the Distance to the nearest Drainage ( $D$ ), respectively (b, c). Using Eq. 1, the  
 285 normalized features  $H$  and  $D$  are multiplied with different weights to generate the  
 286 hydrogeomorphic index (d).

### 287 3.4 Binary classifiers for flood hazard mapping

288 Considering the study area as a grid of cells, a binary classifier assigns a value of zero or one to  
 289 each cell and generates a map of two different classes. In flood hazard mapping, the common

approach is to define a threshold on a hydrogeomorphic index (e.g.  $I_{HD}$ ) and use the following if-and-else rule for the classification:

$$f(i) = \begin{cases} 1 & I_{HD}^i \leq TH \\ 0 & I_{HD}^i > TH \end{cases} \quad (2)$$

where  $f(i)$  and  $I_{HD}^i$  denote the label of flood hazard map and the proposed hydrogeomorphic index value at cell  $i$ , respectively, and  $TH$  denotes the threshold of the hydrogeomorphic classifier that should be calibrated. The flood hazard map generated with the binary classifier is compared with a binary reference hazard map, and the rate of true positive ( $rtp$ ), rate of false positive ( $rfp$ ), and *error* are calculated as follows (Jafarzadegan and Merwade, 2017):

$$rtp = \frac{\text{True positive instances}}{\text{Total positives}} \quad (3)$$

$$rfp = \frac{\text{False positive instances}}{\text{Total negatives}} \quad (4)$$

$$\text{error} = rfp + (1 - rtp) \quad (5)$$

In binary classification, positive and negative refer to a value of one and zero, respectively. True positive instances are those positive cells that are correctly predicted by the classifier and false positive instances represent those negative cells that are wrongly classified as positive. The *error*, reflecting all cells that are wrongly predicted by the classifier, is a commonly-used measure for validating the performance of binary classifiers for flood hazard mapping. Another useful performance measure to validate the binary classifier is the area under the curve (AUC) of the Receiver Operating Characteristic (ROC) graph proposed by Fawcett, (2006).

To calibrate the binary classifier we minimize the *error* while searching for the optimum  $TH$  value.

In this optimization problem, the reference flood hazard map used for calculating the *error* is the



key input that should be further described. The flood inundation maps generated by the hydrodynamic model indicate WLs at different cells in different time steps and should be converted to a single binary map. A common approach used for inland floods is to find the maximum inundation area over the entire flooding period and then assign all cells with zero WL to “dry” or “non-flooded” and other cells with positive values as “wet” or “flooded”. In delta estuaries and coastal regions nearby the ocean, however, almost all cells can be flooded with small WL values. Therefore, after finding the maximum inundation over the flooding period, we use another set of binary labels as “low hazard” vs “high hazard” and define the hazard depth cutoff (HDC) as a threshold used to convert a continuous map of WL to a binary map with only two labels. Depending on the HDC used for distinguishing low from high hazard regions, the reference flood map is changed which results in a different calibrated  $TH$ . In addition to HDC, the intensity of the flood event shown with the return period ( $T$ ) also changes the reference flood hazard map. Therefore, the calibrated parameter  $TH$  is a function of both HDC and  $T$  and the main goal of this study is to provide operative curves showing the variation of  $TH$  with these two factors. We run the hydrodynamic model for 6 different return periods of 10, 50, 100, 200, 500, and 1000 year events and then convert the WL maps to binary maps using 21 HDC resulting from 0.1 increments in the range of 0-2 m. The binary classification and calibration of  $TH$  are performed for different reference maps generated from various combinations of  $T$  and HDC.

#### 4. Results

A comprehensive calibration and validation of the Savannah River model is shown in Figure 4. This step is crucial to ensure that the flood hazard maps provided by the model are reliable enough to be used as the reference of the hydrogeomorphic method. We assess the performance of the model by first comparing simulated and observed WLs at four USGS stations along the Savannah

River (Figure 1b, green circles). For convenience, we only present simulated and observed WLs of Hurricane Matthew and Irma at Garden City (Figure 4c and 4d, respectively) located at ~29.5 km from the river mouth (Figure 4a, yellow square). The results of the remaining stations are included in the supplementary material (Figure S1). The RMSE and  $R^2$  of the ~~gauges~~ stations remain below 30 cm and above 0.90, respectively, for the two hurricane events, which is reflective of satisfactory model performance. Overall, the magnitude and timing of the highest peak WL observed during the hurricanes are well captured by the Savannah River model. To further evaluate the model performance in coastal flood propagation analysis, we compare maximum WLs resulting from model simulations with the USGS HWMs collected in urban and surrounding wetland areas (Figure 4b). The 1:1 line represents a perfect fit between simulated and observed maximum WLs and helps visualize overestimation (above the 1:1 line) and underestimation of the model. Similarly, the evaluation metrics indicate a satisfactory performance of the model with a slightly over- and underestimation during Matthew and Irma. Moreover, the model achieves a relatively small RMSE (< 35 cm) and MAE (< 30 cm).

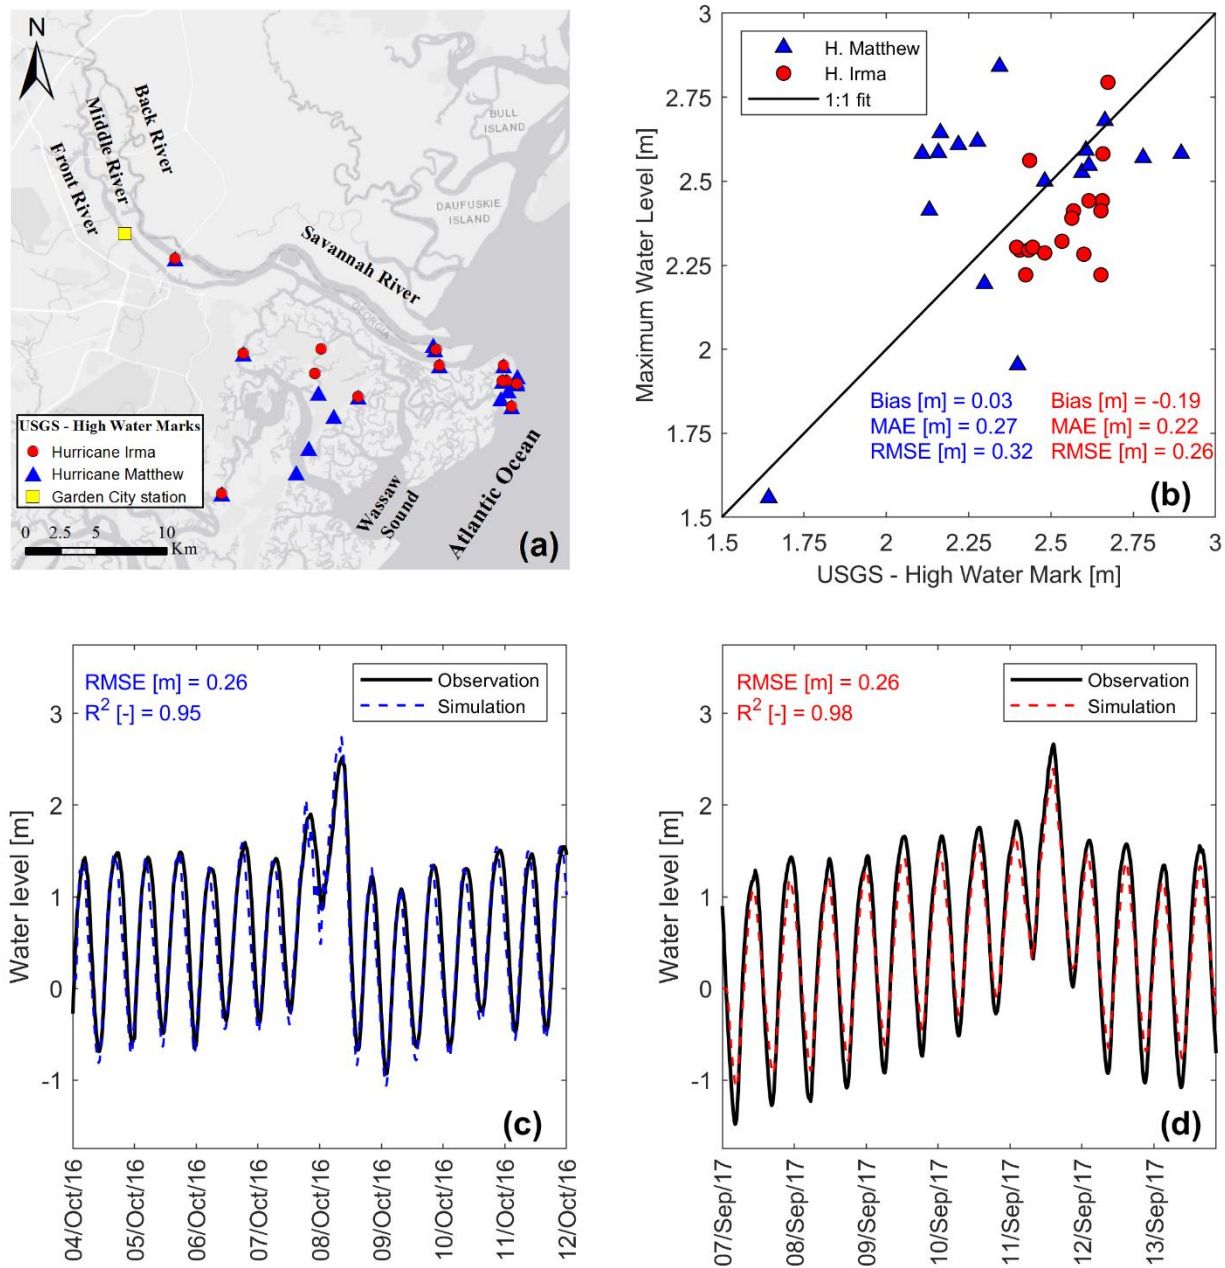

**Figure 4.** Calibration and validation of the Savannah Delft3D-FM model. (a) Location of high-water marks (HWMs) in the Savannah River delta for Hurricane Mathew (blue triangles) and Hurricane Irma (red circles). (b) Comparison between simulated maximum WLs and HWMs in Savannah. (c and d) Time series of simulated and observed WLs at Garden station for Hurricane Matthew and Hurricane Irma, respectively.

To generate boundary conditions for coastal flood modeling simulations associated with the proposed return periods, we perform flood frequency analysis of coastal WL at the Fort Pulaski station (in Figure 5) located at the mouth of the Savannah River (Figure 1b, yellow circle). In this study, we select Generalized Extreme Value (GEV) because of its smallest estimated BIC compared to other parametric distributions available at the *'allfitdist'* tool. In addition, we show the 95% confidence bounds of the GEV distribution and fit a non-parametric Weibull distribution to the data for comparison purposes. Hereinafter, we will use the GEV distribution to estimate WLs for 10, 50, 100, 200, 500, and 1000-year return periods.

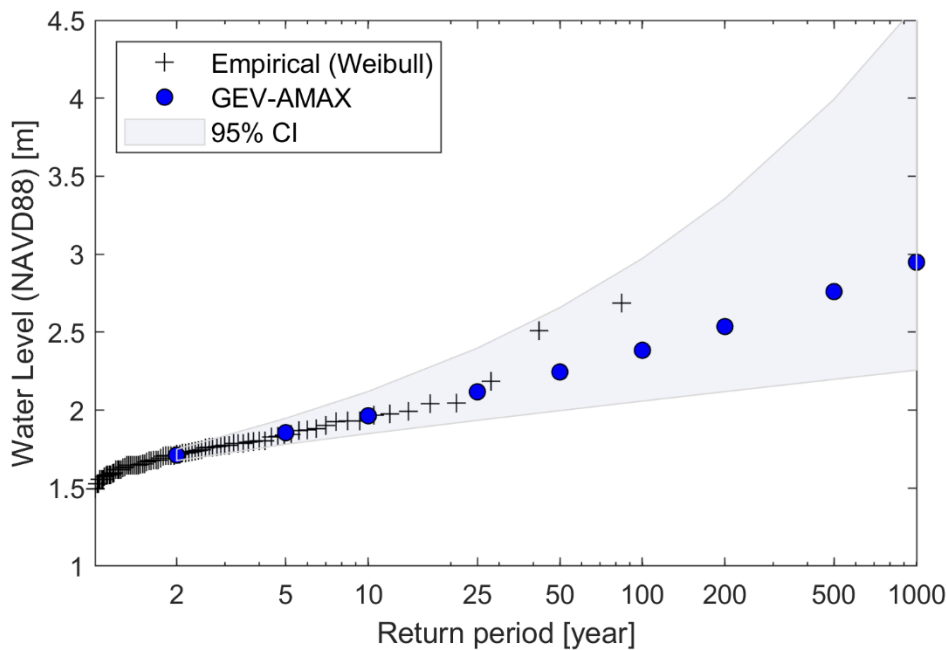

**Figure 5.** Return WLs for Fort Pulaski station in Savannah GA (NOAA - 8670870). Plotting positions (black crosses) are derived from the Weibull formula based on annual block maxima time series (AMAX) and comparable to the Generalized Extreme Value (GEV) distribution (blue circles). 95% confidence intervals (CI) for the distribution parameters of the GEV distribution are shown with a shaded blue band.

370 After calibrating the Delft3D-FM model, we generate daily flood inundation maps for Hurricane  
371 Matthew, determine the maximum flood extent among all days, and then use an HDC to convert  
372 the maximum inundation map to a binary map of low and high hazard classes. Using 21 different  
373 HDCs ranging from 0 to 2 m, we perform 21 calibrations corresponding to a given reference flood  
374 hazard map generated from a specific HDC value. Figure 6a shows the *error* and AUC of  
375 calibration corresponding to different HDC values. As can be seen, increasing the HDC decreases  
376 the accuracy of the hydrogeomorphic method for flood hazard mapping. Looking into the errors  
377 and AUC values reported in the literature of binary flood hazard mapping studies, we consider an  
378 error of 0.2 and an AUC of 0.9 (dash lines) as the limits for distinguishing acceptable models from  
379 unacceptable ones. The grey region indicates the rejected HDC values above 1.1 m that result in  
380 unacceptable accuracy (e.g.,  $Error > 0.2$  or  $AUC < 0.9$ ). Figure 6b indicates the optimum weights  
381 calculated from the calibration of the hydrogeomorphic method corresponding to different HDC  
382 values. The higher value of  $w_1$  compared to  $w_2$  demonstrates that feature  $H$  is a more important  
383 factor than feature  $D$  in representing the flood hazard areas, and a combination of both features is  
384 the best indicator of floodplains compared to using each feature individually ( $w_1 = 0$  or  $w_2 = 0$ ).  
385 Figure 6b also shows that for the  $HDC = 0$  (wet vs dry classification), feature  $D$  shows the highest  
386 contribution (30%) while using the high HDC value of 2 m decreases the contribution of this  
387 feature to almost zero.

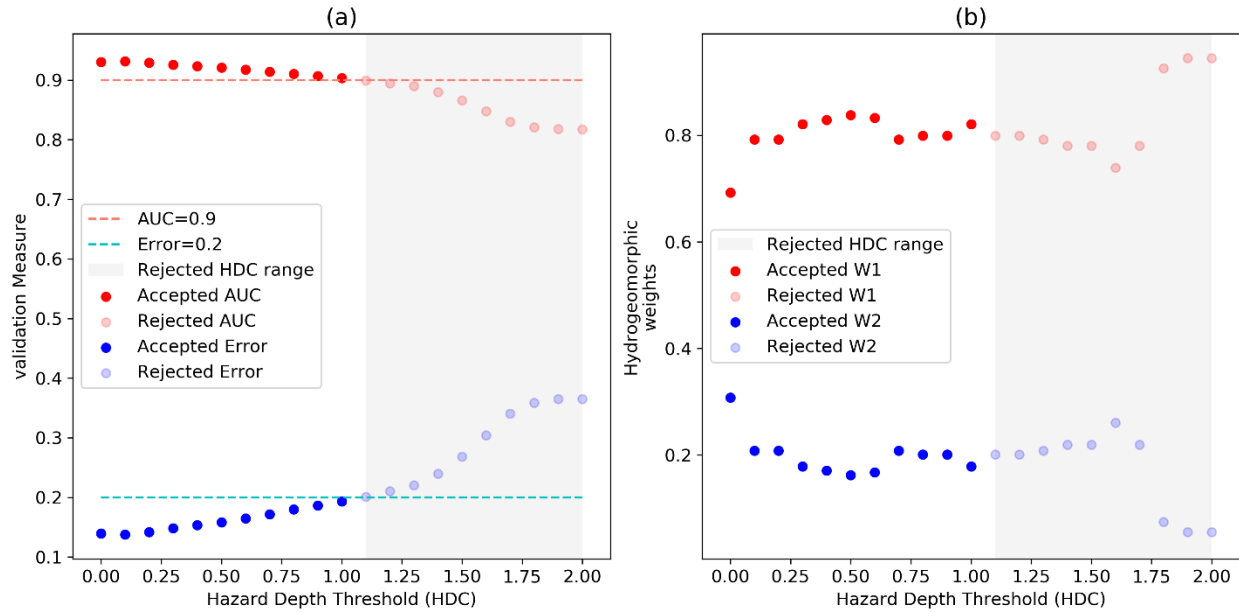

**Figure 6.** Calibration of Hydrogeomorphic index for Hurricane Matthew. (a) the variation of performance measures AUC (red) and error (blue) for different HDC values and (b) the optimum weights of the hydrogeomorphic index for different HDC values. The dash lines show the maximum error (0.2) and minimum AUC (0.9) that are acceptable for flood hazard mapping. Using these criteria, the gray regions show that the hydrogeomorphic model cannot provide acceptable results for HDC values higher than 1.1 m.

To generate the operative curves for future flood events, we design 36 scenarios that include 6 HDCs (0, 0.2, 0.4, 0.6, 0.8, 1 m) from the acceptable range of 0-1 m for six different reference hazard maps, provided by the Delft3D-FM model for return periods of 10, 50, 100, 200, 500, and 1000 years. Each scenario provides a reference hazard map, so a binary classification is performed to estimate TH corresponding to each scenario. Figure 7a indicates the error curves for different return period events. For low HDCs, increasing the magnitude of the flood (higher return period) results in more accuracy of the hydrogeomorphic method. This pattern is opposite for high HDCs where flood event with a 10 year return period provides the highest accuracy. In general, the grey

region shows that for high HDCs, the performance of the hydrogeomorphic method is poor for almost all return periods while for low HDCs, all flood events can be accurately used for flood hazard mapping. Figure 7b illustrates the hydrogeomorphic threshold operative curves for future flood hazard mapping. The  $TH$  in the y-axis is the key value that can be estimated for each combination of HDC and return period. Knowing this threshold, Eq. 2 can be used to rapidly estimate the hazard areas for future floods. As expected, a higher magnitude of flood needs a higher hydrogeomorphic threshold while increasing HDC (smaller high-hazard areas) requires a smaller threshold for binary classification. The grey parts of the curves refer to those scenarios that have unacceptable accuracy so it is recommended to not use HDCs corresponding to these parts.

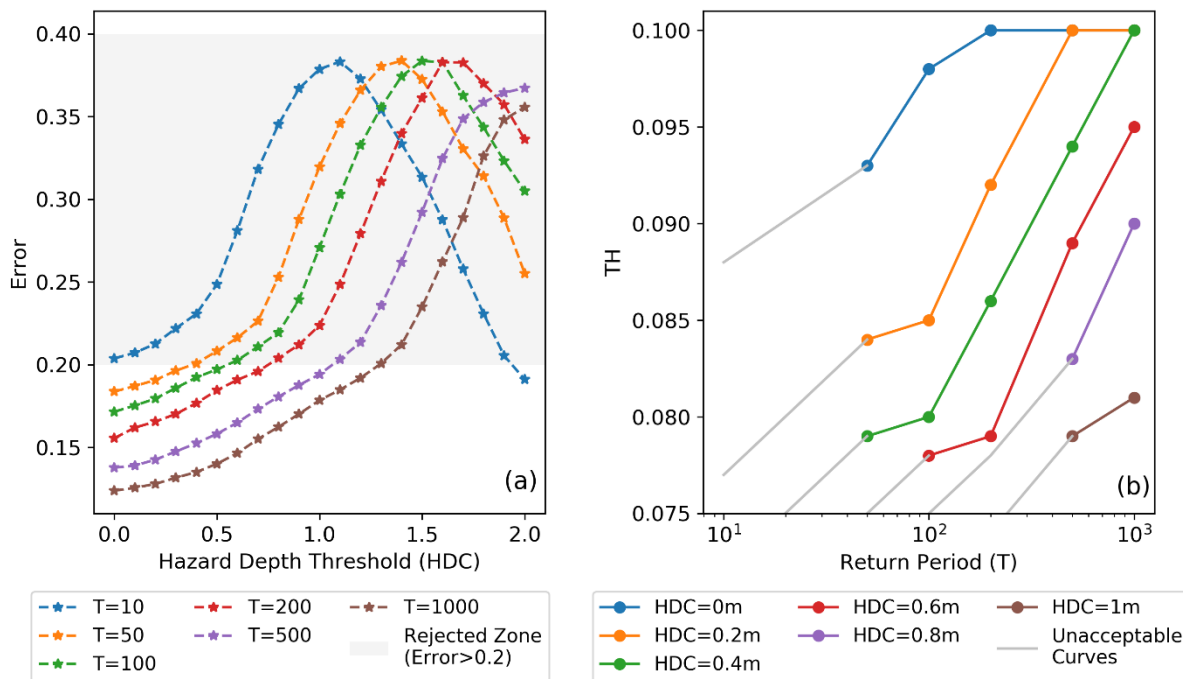

**Figure 7.** (a) The errors of flood hazard maps generated by the calibrated hydrogeomorphic method for different return period flood events and HDC values. (b) The hydrogeomorphic threshold operative curves provided for different HDC values. These operative curves are the

major tool for fast flood hazard mapping as depending on the return period of a future flood event and the HDC value chosen by the decision-maker, the operative curves estimate the hydrogeomorphic threshold. Knowing this threshold, the flood hazard map will be generated in a few minutes.

Finally, we evaluate the accuracy and effectiveness of the proposed operative curves by validating their performance in generating flood hazard areas during Hurricane Irma. The maximum WL during this flood event was 2.49 m that corresponds to a 223-year flood event according to our flood frequency analysis (e.g., GEV distribution). For two HDCs of 0 and 0.6 m, the operative curves suggest the hydrogeomorphic thresholds of 0.1 and 0.08, respectively. Using these thresholds and Eq.2, the flood hazard maps corresponding to Hurricane Irma can be generated. Figure 8 indicates a side by side comparison of flood hazard maps generated by the Delft3D-FM model (Figures 8a and 8c) and the hydrogeomorphic threshold operative curves (Figures 8b and 8d) for two different HDCs of 0 (Figures 8a and 8b) and 0.6 m (Figures 8c and 8d). For both HDCs, errors (0.152 and 0.186) are less than a 0.2 limit used for reliable flood hazard mapping. The main errors of the hydrogeomorphic method are some noisy scattered low-hazard areas located in the east and southeast of the study area. The red circle in the left part of the figures also shows a region that the hydrogeomorphic method cannot properly simulate, especially for higher HDCs. On the other hand, the red eclipse at the right side of the figures illustrates an urbanized region where the hydrogeomorphic method properly classifies the area compared to the reference map. Overall, the high overlap of the flood hazard maps provided by the hydrogeomorphic method with the reference maps provided by the hydrodynamic model (error <0.2) illustrates the reliability and effectiveness of the proposed hydrogeomorphic method for flood hazard mapping. Besides, the high efficiency of this approach for rapid estimation of flood hazard maps (order of minutes) compared to the long



computational time required for detailed hydrodynamic modeling (order of hours) suggests the proposed hydrogeomorphic method as an alternative for efficient flood hazard mapping during emergencies.

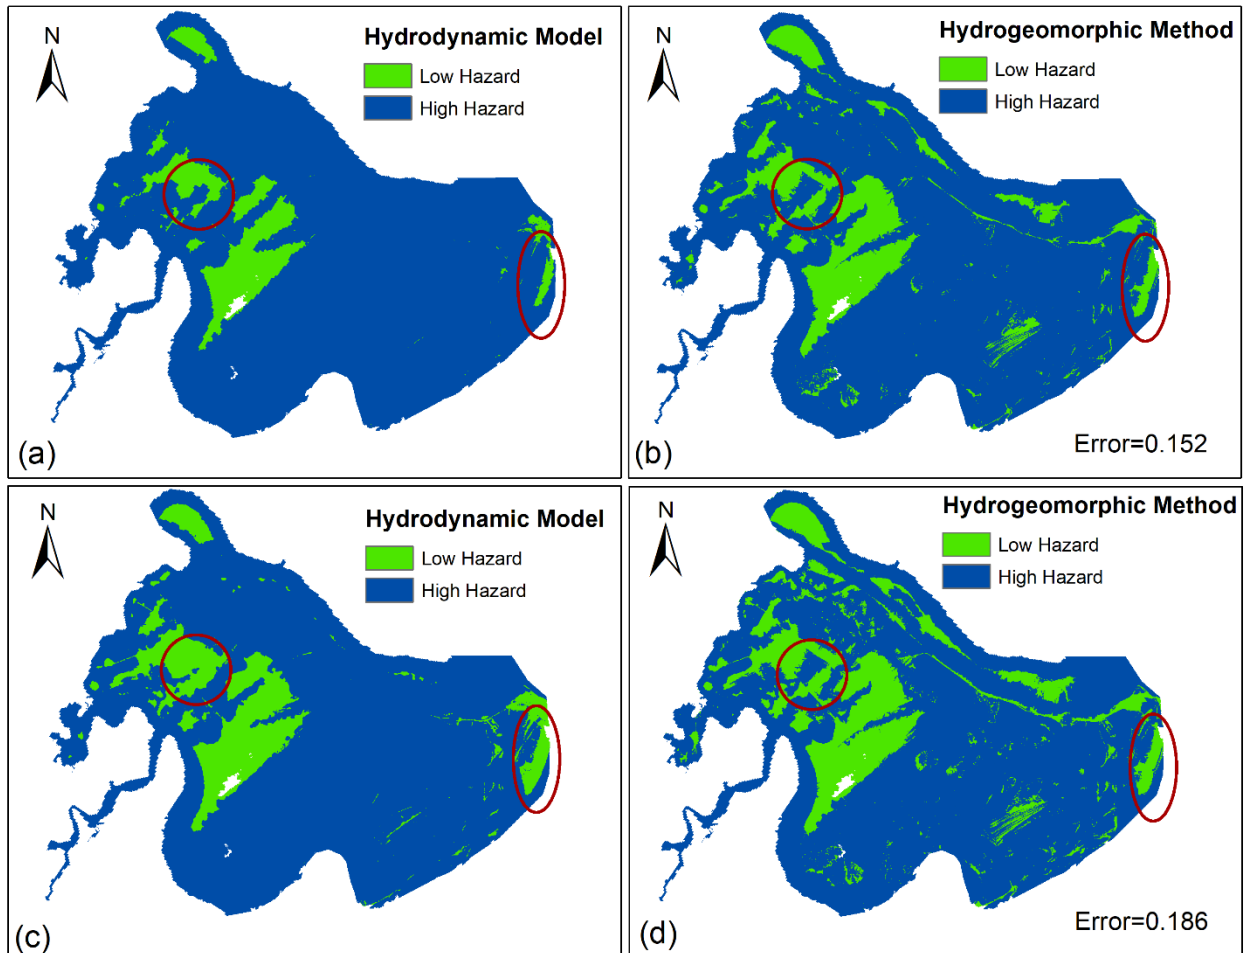

**Figure 8.** Validation results for Hurricane Irma showing a side-by-side comparison of flood hazard maps generated by the hydrodynamic model and hydrogeomorphic method for HDC=0 (a, b) and HDC=0.6 m (c, d). To generate the flood hazard maps by the hydrogeomorphic method, the operative curves estimate two hydrogeomorphic thresholds of 0.1 and 0.08 for HDC= 0 m and HDC= 0.6 m, respectively while the return period of Hurricane Irma is estimated as a 223 years flood event.

## 5. Discussion

This study develops hydrogeomorphic threshold operative curves for rapid estimation of hazardous areas during emergencies of future coastal floods in deltas and estuaries. The low errors ( $<0.2$ ) of estimated hazard maps for Hurricane Irma generated by the proposed approach compared to the reference hydrodynamic model results demonstrate the high accuracy of the proposed operative curves for future flood events in this region. According to studies conducted on the binary classification of hydrogeomorphic features in the literature, the errors of the best classifiers were mostly in the range of 0.2-0.3 for inland floods (Degiorgis et al., 2012; Manfreda et al., 2014). Therefore, given the more complexity of terrain and drainage network in deltas, predicting the hazard maps with errors less than 0.2 (e.g. error of 0.152 for  $HDC=0$ ) is a promising achievement. The potential reasons explaining a high accuracy of the proposed binary classifier for wetlands include the high-resolution DEM used for mapping ( $\sim 3m$ ), and the incorporation of bathymetry into DEM. In addition, the flexible structure of the proposed hydrogeomorphic index, with two varying weights of  $H$  and  $D$  features, allows for calibrating the index with the optimum contribution of each feature, which in return results in the highest accuracy.

Unlike past studies that used binary classifiers for detecting hazard areas corresponding to past floods or generated static maps for a specific return period event (Degiorgis et al., 2012; Jafarzadegan et al., 2018; Manfreda et al., 2015b; Samela et al., 2017), here we propose the hydrogeomorphic threshold operative curves for real-time flood hazard mapping. Considering the rapid occurrence of hurricane-induced flooding in deltas and estuaries, these curves can be highly beneficial for emergency responders to provide a preliminary estimation of hazard areas for an upcoming flood in these regions and design the appropriate evacuation strategies. In addition, the proposed operative curves demonstrate the hydrogeomorphic threshold variations with HDCs.

This feature of the operative curves gives additional flexibility to decision-makers for estimating the hazard maps based on the HDC that is considered given the momentary safety issues. For example, identifying the hazard map based on  $HDC < 0.3$  is useful for checking the operability and accessibility of essential facilities and infrastructure, while a hazard map corresponding to  $HDC = 1$  indicates those areas that experience high WLs above 1 m as hazardous areas, with greater potential for casualties and significant structural damage. Overall, the hydrogeomorphic threshold operative curves are a function of both the return period (flood severity) and HDC (a decision-making option that controls the definition of high hazard). Using a similar approach, future studies can provide these curves for inland floods as well. In addition, due to the practical benefits of these curves for efficient coastal flood hazard assessment, the hydrogeomorphic threshold operative curves can be extended to other deltas and estuaries that experience frequent flooding across the US (e.g., Mississippi - LA, Galveston Bay - TX, Delaware Bay - DE, Chesapeake Bay - VA, among others) and the world (e.g. Yangtze - China, Brahmaputra - Bangladesh, among others).

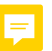

The reference maps used for training the binary classifier are key components for generating reliable results. Since these reference maps are the outcomes of hydrodynamic modeling, they are prone to uncertainties stemming from unrealistic parametrization, imperfect model structure, and erroneous forcing. The design floods used as boundary conditions of the hydrodynamic model are estimated from flood frequency analysis that is prone to uncertainty as well. With access to less than 100 years of data for flood frequency analysis, the extreme return levels (i.e. 500 and 1000 year floods) pose high uncertainties due to the extrapolation of annual maxima data. This should warn decision-makers to be more cautious about using operative curves for extreme flood events. For future studies, the uncertainty bounds of flood frequency analysis (especially extrapolations for extreme cases) can be considered in the modeling. In a real-time scenario, the forecasted WL

used for flood frequency analysis is also prone to uncertainties originating from imperfect forecasting methods and nonstationary climate data. In addition, the uncertainty of model parametrization can be accounted for by running the hydrodynamic model for different combinations of optimum parameters. Model structure uncertainty can be also considered by using different hydrodynamic models and combining the results. Finally, probabilistic reference maps together with uncertainties involved in WL forecasting and flood frequency analysis can be integrated to develop probabilistic hydrogeomorphic threshold operative curves in future studies. This is in line with the report provided for the NOAA National Weather Service (NWS), showing the NWS stakeholder's preference for utilizing probabilistic storm surge inundation maps in the future (Eastern Research Group, Inc, 2013). The probabilistic operative curves account for the major source of uncertainties and provide a more reliable decision-making tool for coastal flood hazard mapping.

The operative hydrogeomorphic threshold classifiers proposed for real-time coastal flood hazard mapping can be used as an alternative tool for the rapid estimation of hazardous areas. In the operational mode, the water level forecasts provided by the NWS can be used to estimate the return period of an upcoming coastal flood event. Using the proposed operative curves, the hydrogeomorphic threshold is determined and the flood hazard map is generated. The Sea, Lake, and Overland Surges from Hurricanes (SLOSH) model is an LCFM tool currently used by NWS to estimate probabilistic storm surge forecasts. The flood inundation maps generated by this model are the results of overlaying storm surge forecast with DEM. The model doesn't consider the streamflow network and riverine flood mechanisms. On the other hand, our proposed hydrogeomorphic index uses both streamflow network and DEM to provide a more detailed representation of the flooding in coastal areas. Another LCFM approach is to train machine

learning algorithms on reference inundation maps provided by well-calibrated hydrodynamic models (Bass and Bedient, 2018). A benchmark study that compares the performance (accuracy and efficiency) of three LCFM methods, including our proposed DEM-based hydrogeomorphic classifier, the surrogate machine learning-based algorithm, and the SLOSH model is highly recommended for future studies.

## 6. Summary and Conclusion

In this study, we proposed binary classifiers for efficient flood hazard mapping in deltas and estuaries. The HAND, typically used for inland flooding, is modified for flat regions along the coastline, and a new hydrogeomorphic index  $I_{HD}$  that comprises both HAND and distance to nearest drainage was developed. The DEM used as the base of these binary classifiers is a 3 m Lidar that includes bathymetric information. This is another improvement compared to previous DEM-based classifiers that commonly used 10-30 m DEMs without bathymetric data. The  $I_{HD}$  index has two unknown weights that show the contribution of both HAND and feature  $D$ . We simulated Hurricane Matthew with the Delft3D-FM model and used the results as a reference flood hazard map to calibrate the  $I_{HD}$  index. Using Delft3D-FM again, we generated six flood hazard maps corresponding to different return periods and employed these maps as a reference to generate the hydrogeomorphic threshold operative curves. Finally, we validated the proposed operative curves for reliable and efficient flood hazard mapping by comparing the flood hazard maps generated for Hurricane Irma with the proposed curves and the Delft3D-FM model. The high accuracy of validation results ( $<0.2$  error) together with the rapid fashion of this approach for real-time flood hazard mapping suggests the proposed operative curves as a practical decision-making tool for on-time and reliable estimation of hazard areas in estuaries.

## **Data availability**

All the data used in this study, including the gauge streamflow and water stage data are publicly available from the USGS and NOAA websites. The High Water Marks provided for Hurricanes Irma and Matthew are available from the USGS Flood Event Viewer platform.

## **Author contribution**

KJafarzadegan and HMoradkhani conceptualized the study. KJafarzadegan designed the whole framework and implemented the hydrogeomorphic methodology. DMuñoz implemented the hydrodynamic modeling. KJafarzadegan and DMuñoz wrote the first draft of the manuscript. HMoradkhani, HMoftakhari a JGutenson, and GSavant provided comments and edited the manuscript.

## **Competing interests**

The authors declare that they have no conflict of interest.

## **Acknowledgment**

This work was financially supported by the USACE award # A20-0545-001. We would like to thank the anonymous reviewers for their constructive comments on the original version of the manuscript.

## References

- Afshari, S., Tavakoly, A. A., Rajib, M. A., Zheng, X., Follum, M. L., Omranian, E., and Fekete, B. M.: Comparison of new generation low-complexity flood inundation mapping tools with a hydrodynamic model, *J. Hydrol.*, 556, 539–556, <https://doi.org/10.1016/j.jhydrol.2017.11.036>, 2018.
- Alizad, K., Hagen, S. C., Medeiros, S. C., Bilskie, M. V., Morris, J. T., Balthis, L., and Buckel, C. A.: Dynamic responses and implications to coastal wetlands and the surrounding regions under sea level rise, *PLOS ONE*, 13, e0205176, <https://doi.org/10.1371/journal.pone.0205176>, 2018.
- USGS Surface Water Information: <https://water.usgs.gov/osw/iwrss/>, last access: 16 November 2021.
- Arcement, G. J. and Schneider, V. R.: Guide for selecting Manning’s roughness coefficients for natural channels and flood plains, 1989.
- Barbier, E. B.: Chapter 27 - The Value of Coastal Wetland Ecosystem Services, in: *Coastal Wetlands*, edited by: Perillo, G. M. E., Wolanski, E., Cahoon, D. R., and Hopkinson, C. S., Elsevier, 947–964, <https://doi.org/10.1016/B978-0-444-63893-9.00027-7>, 2019.
- Bass, B. and Bedient, P.: Surrogate modeling of joint flood risk across coastal watersheds, *J. Hydrol.*, 558, 159–173, <https://doi.org/10.1016/j.jhydrol.2018.01.014>, 2018.
- Bates, P. D., Horritt, M. S., and Fewtrell, T. J.: A simple inertial formulation of the shallow water equations for efficient two-dimensional flood inundation modelling, *J. Hydrol.*, 387, 33–45, <https://doi.org/10.1016/j.jhydrol.2010.03.027>, 2010.
- Bates, P. D., Quinn, N., Sampson, C., Smith, A., Wing, O., Sosa, J., Savage, J., Olcese, G., Neal, J., Schumann, G., Giustarini, L., Coxon, G., Porter, J. R., Amodeo, M. F., Chu, Z., Lewis-Gruss, S., Freeman, N. B., Houser, T., Delgado, M., Hamidi, A., Bolliger, I., E. McCusker, K., Emanuel, K., Ferreira, C. M., Khalid, A., Haigh, I. D., Couasnon, A., E. Kopp, R., Hsiang, S., and Krajewski, W. F.: Combined Modeling of US Fluvial, Pluvial, and Coastal Flood Hazard Under Current and Future Climates, *Water Resour. Res.*, 57, e2020WR028673, <https://doi.org/10.1029/2020WR028673>, 2021.
- Chow Ven, T.: Open channel hydraulics, 1959.
- Davidson, N. C.: How much wetland has the world lost? Long-term and recent trends in global wetland area, *Mar. Freshw. Res.*, 65, 934–941, <https://doi.org/10.1071/MF14173>, 2014.
- Degiorgis, M., Gnecco, G., Gorni, S., Roth, G., Sanguineti, M., and Taramasso, A. C.: Classifiers for the detection of flood-prone areas using remote sensed elevation data, *J. Hydrol.*, 470–471, 302–315, <https://doi.org/10.1016/j.jhydrol.2012.09.006>, 2012.

593 Degiorgis, M., Gnecco, G., Gorni, S., Roth, G., Sanguineti, M., and Taramasso, A. C.: Flood  
 594 Hazard Assessment Via Threshold Binary Classifiers: Case Study of the Tanaro River Basin, *Irrig.*  
 595 *Drain.*, 62, 1–10, <https://doi.org/10.1002/ird.1806>, 2013.

596 Dodov, B. A. and Fofoula-Georgiou, E.: Floodplain morphometry extraction from a high-  
 597 resolution digital elevation model: a simple algorithm for regional analysis studies, *IEEE Geosci.*  
 598 *Remote Sens. Lett.*, 3, 410–413, <https://doi.org/10.1109/LGRS.2006.874161>, 2006.

599 Eastern Research Group, Inc: Hurricane Forecast Improvement Program Socio-Economic  
 600 Research and Recommendations:, NOAA National Weather Service, 2013.

601 Fagherazzi, S., Mariotti, G., Banks, A. T., Morgan, E. J., and Fulweiler, R. W.: The relationships  
 602 among hydrodynamics, sediment distribution, and chlorophyll in a mesotidal estuary, *Estuar.*  
 603 *Coast. Shelf Sci.*, 144, 54–64, <https://doi.org/10.1016/j.ecss.2014.04.003>, 2014.

604 Familkhalili, R., Talke, S. A., and Jay, D. A.: Tide-Storm Surge Interactions in Highly Altered  
 605 Estuaries: How Channel Deepening Increases Surge Vulnerability, *J. Geophys. Res. Oceans*, 125,  
 606 e2019JC015286, <https://doi.org/10.1029/2019JC015286>, 2020.

607 Fawcett, T.: An introduction to ROC analysis, *Pattern Recognit. Lett.*, 27, 861–874,  
 608 <https://doi.org/10.1016/j.patrec.2005.10.010>, 2006.

609 Gharari, S., Hrachowitz, M., Fenicia, F., and Savenije, H. H. G.: Hydrological landscape  
 610 classification: investigating the performance of HAND based landscape classifications in a  
 611 central European meso-scale catchment, *Hydrol. Earth Syst. Sci.*, 15, 3275–3291,  
 612 <https://doi.org/10.5194/hess-15-3275-2011>, 2011.

613 Gutenson, J.: A Review of Current and Future NWS Services, 2020.

614 Gutenson, J. L., Tavakoly, A. A., Massey, T. C., Savant, G., Tritinger, A. S., Owensby, M. B., Wahl,  
 615 M. D., and Islam, M. S.: Investigating Modeling Strategies to Couple Inland Hydrology and  
 616 Coastal Hydraulics to Better Understand Compound Flood Risk, 64–75,  
 617 <https://doi.org/10.1061/9780784483466.006>, 2021.

618 Helton, J. C. and Davis, F. J.: Latin hypercube sampling and the propagation of uncertainty in  
 619 analyses of complex systems, *Reliab. Eng. Syst. Saf.*, 81, 23–69, 2003.

620 IWRSS: Requirements for the National Flood Inundation Mapping Services, National Oceanic  
 621 and Atmospheric Administration United States Army Corps of Engineers United States  
 622 Geological Survey, 2013.

623 IWRSS: Design for the National Flood Inundation Mapping Services, National Oceanic and  
 624 Atmospheric Administration United States Army Corps of Engineers United States Geological  
 625 Survey, 2015.



626 Jafarzadegan, K. and Merwade, V.: A DEM-based approach for large-scale floodplain mapping in  
627 ungauged watersheds, *J. Hydrol.*, 550, 650–662, <https://doi.org/10.1016/j.jhydrol.2017.04.053>,  
628 2017.

629 Jafarzadegan, K. and Merwade, V.: Probabilistic floodplain mapping using HAND-based  
630 statistical approach, *Geomorphology*, 324, 48–61,  
631 <https://doi.org/10.1016/j.geomorph.2018.09.024>, 2019.

632 Jafarzadegan, K., Merwade, V., and Saksena, S.: A geomorphic approach to 100-year floodplain  
633 mapping for the Conterminous United States, *J. Hydrol.*, 561, 43–58,  
634 <https://doi.org/10.1016/j.jhydrol.2018.03.061>, 2018.

635 Jafarzadegan, K., Merwade, V., and Moradkhani, H.: Combining clustering and classification for  
636 the regionalization of environmental model parameters: Application to floodplain mapping in  
637 data-scarce regions, *Environ. Model. Softw.*, 125, 104613,  
638 <https://doi.org/10.1016/j.envsoft.2019.104613>, 2020.

639 Khojasteh, D., Chen, S., Felder, S., Heimhuber, V., and Glamore, W.: Estuarine tidal range  
640 dynamics under rising sea levels, *PLOS ONE*, 16, e0257538,  
641 <https://doi.org/10.1371/journal.pone.0257538>, 2021a.

642 Khojasteh, D., Glamore, W., Heimhuber, V., and Felder, S.: Sea level rise impacts on estuarine  
643 dynamics: A review, *Sci. Total Environ.*, 780, 146470,  
644 <https://doi.org/10.1016/j.scitotenv.2021.146470>, 2021b.

645 Kirwan, M. L. and Megonigal, J. P.: Tidal wetland stability in the face of human impacts and sea-  
646 level rise, *Nature*, 504, 53–60, <https://doi.org/10.1038/nature12856>, 2013.

647 Kulp, S. A. and Strauss, B. H.: New elevation data triple estimates of global vulnerability to sea-  
648 level rise and coastal flooding, *Nat. Commun.*, 10, 4844, [https://doi.org/10.1038/s41467-019-](https://doi.org/10.1038/s41467-019-12808-z)  
649 12808-z, 2019.

650 Kumbier, K., Carvalho, R. C., Vafeidis, A. T., and Woodroffe, C. D.: Investigating compound  
651 flooding in an estuary using hydrodynamic modelling: a case study from the Shoalhaven River,  
652 Australia, *Nat. Hazards Earth Syst. Sci.*, 18, 463–477, [https://doi.org/10.5194/nhess-18-463-](https://doi.org/10.5194/nhess-18-463-2018)  
653 2018, 2018.

654 Land, M., Tonderski, K., and Verhoeven, J. T. A.: Wetlands as Biogeochemical Hotspots Affecting  
655 Water Quality in Catchments, in: *Wetlands: Ecosystem Services, Restoration and Wise Use*,  
656 edited by: An, S. and Verhoeven, J. T. A., Springer International Publishing, Cham, 13–37,  
657 [https://doi.org/10.1007/978-3-030-14861-4\\_2](https://doi.org/10.1007/978-3-030-14861-4_2), 2019.

658 Liu, Z., Merwade, V., and Jafarzadegan, K.: Investigating the role of model structure and surface  
659 roughness in generating flood inundation extents using one-and two-dimensional hydraulic  
660 models, *J. Flood Risk Manag.*, 12, e12347, 2019.

661 Longenecker, H. E., Graeden, E., Kluskiewicz, D., Zuzak, C., Rozelle, J., and Aziz, A. L.: A rapid  
 662 flood risk assessment method for response operations and nonsubject-matter-expert  
 663 community planning, *J. Flood Risk Manag.*, 13, e12579, <https://doi.org/10.1111/jfr3.12579>,  
 664 2020.

665 Luettich, R. A. (Richard A., Westerink, J. J., and Scheffner, N. W.: ADCIRC : an advanced three-  
 666 dimensional circulation model for shelves, coasts, and estuaries. Report 1, Theory and  
 667 methodology of ADCIRC-2DD1 and ADCIRC-3DL, This Digit. Resour. Was Creat. Scans Print  
 668 Resour., 1992.

669 Maidment, D. R.: Conceptual Framework for the National Flood Interoperability Experiment,  
 670 *JAWRA J. Am. Water Resour. Assoc.*, 53, 245–257, <https://doi.org/10.1111/1752-1688.12474>,  
 671 2017.

672 Maidment, D. R., Clark, E., Hooper, R., and Ernest, A.: National Flood Interoperability  
 673 Experiment, in: *AGU Fall Meeting Abstracts*, 2014.

674 Manfreda, S., Di Leo, M., and Sole, A.: Detection of Flood-Prone Areas Using Digital Elevation  
 675 Models, *J. Hydrol. Eng.*, 16, 781–790, [https://doi.org/10.1061/\(ASCE\)HE.1943-5584.0000367](https://doi.org/10.1061/(ASCE)HE.1943-5584.0000367),  
 676 2011.

677 Manfreda, S., Nardi, F., Samela, C., Grimaldi, S., Taramasso, A. C., Roth, G., and Sole, A.:  
 678 Investigation on the use of geomorphic approaches for the delineation of flood prone areas, *J.*  
 679 *Hydrol.*, 517, 863–876, <https://doi.org/10.1016/j.jhydrol.2014.06.009>, 2014.

680 Manfreda, S., Samela, C., Gioia, A., Consoli, G. G., Iacobellis, V., Giuzio, L., Cantisani, A., and  
 681 Sole, A.: Flood-prone areas assessment using linear binary classifiers based on flood maps  
 682 obtained from 1D and 2D hydraulic models, *Nat. Hazards*, 79, 735–754,  
 683 <https://doi.org/10.1007/s11069-015-1869-5>, 2015a.

684 Manfreda, S., Samela, C., Gioia, A., Consoli, G. G., Iacobellis, V., Giuzio, L., Cantisani, A., and  
 685 Sole, A.: Flood-prone areas assessment using linear binary classifiers based on flood maps  
 686 obtained from 1D and 2D hydraulic models, *Nat. Hazards*, 79, 735–754,  
 687 <https://doi.org/10.1007/s11069-015-1869-5>, 2015b.

688 McGlynn, B. L. and McDonnell, J. J.: Quantifying the relative contributions of riparian and  
 689 hillslope zones to catchment runoff, *Water Resour. Res.*, 39,  
 690 <https://doi.org/10.1029/2003WR002091>, 2003.

691 McGlynn, B. L. and Seibert, J.: Distributed assessment of contributing area and riparian  
 692 buffering along stream networks, *Water Resour. Res.*, 39,  
 693 <https://doi.org/10.1029/2002WR001521>, 2003.

694 McGrath, H., Bourgon, J.-F., Proulx-Bourque, J.-S., Nastev, M., and Abo El Ezz, A.: A comparison  
 695 of simplified conceptual models for rapid web-based flood inundation mapping, *Nat. Hazards*,  
 696 93, 905–920, <https://doi.org/10.1007/s11069-018-3331-y>, 2018.

697 Medeiros, S., Hagen, S., Weishampel, J., and Angelo, J.: Adjusting Lidar-Derived Digital Terrain  
698 Models in Coastal Marshes Based on Estimated Aboveground Biomass Density, *Remote Sens.*,  
699 7, 3507–3525, <https://doi.org/10.3390/rs70403507>, 2015.

700 Morton, R. A. and Barras, J. A.: Hurricane Impacts on Coastal Wetlands: A Half-Century Record  
701 of Storm-Generated Features from Southern Louisiana, *J. Coast. Res.*, 27, 27–43,  
702 <https://doi.org/10.2112/JCOASTRES-D-10-00185.1>, 2011.

703 Muis, S., Lin, N., Verlaan, M., Winsemius, H. C., Ward, P. J., and Aerts, J. C. J. H.: Spatiotemporal  
704 patterns of extreme sea levels along the western North-Atlantic coasts, *Sci. Rep.*, 9, 3391,  
705 <https://doi.org/10.1038/s41598-019-40157-w>, 2019.

706 Muñoz, D. F., Cissell, J. R., and Moftakhari, H.: Adjusting Emergent Herbaceous Wetland  
707 Elevation with Object-Based Image Analysis, Random Forest and the 2016 NLCD, *Remote Sens.*,  
708 11, 2346, <https://doi.org/10.3390/rs11202346>, 2019.

709 Muñoz, D. F., Moftakhari, H., and Moradkhani, H.: Compound effects of flood drivers and  
710 wetland elevation correction on coastal flood hazard assessment, *Water Resour. Res.*, 56,  
711 e2020WR027544, 2020.

712 Muñoz, D. F., Muñoz, P., Moftakhari, H., and Moradkhani, H.: From local to regional compound  
713 flood mapping with deep learning and data fusion techniques, *Sci. Total Environ.*, 782, 146927,  
714 2021.

715 Nardi, F., Vivoni, E. R., and Grimaldi, S.: Investigating a floodplain scaling relation using a  
716 hydrogeomorphic delineation method, *Water Resour. Res.*, 42,  
717 <https://doi.org/10.1029/2005WR004155>, 2006.

718 Roelvink, J. A. and Banning, G. K. F. M. V.: Design and development of DELFT3D and application  
719 to coastal morphodynamics, *Oceanogr. Lit. Rev.*, 11, 925, 1995.

720 Rogers, J. N., Parrish, C. E., Ward, L. G., and Burdick, D. M.: Improving salt marsh digital  
721 elevation model accuracy with full-waveform lidar and nonparametric predictive modeling,  
722 *Estuar. Coast. Shelf Sci.*, 202, 193–211, <https://doi.org/10.1016/j.ecss.2017.11.034>, 2018.

723 Samela, C., Manfreda, S., Paola, F. D., Giugni, M., Sole, A., and Fiorentino, M.: DEM-Based  
724 Approaches for the Delineation of Flood-Prone Areas in an Ungauged Basin in Africa, *J. Hydrol.*  
725 *Eng.*, 21, 06015010, [https://doi.org/10.1061/\(ASCE\)HE.1943-5584.0001272](https://doi.org/10.1061/(ASCE)HE.1943-5584.0001272), 2016.

726 Samela, C., Troy, T. J., and Manfreda, S.: Geomorphic classifiers for flood-prone areas  
727 delineation for data-scarce environments, *Adv. Water Resour.*, 102, 13–28,  
728 <https://doi.org/10.1016/j.advwatres.2017.01.007>, 2017.

729 Schieder, N. W., Walters, D. C., and Kirwan, M. L.: Massive Upland to Wetland Conversion  
730 Compensated for Historical Marsh Loss in Chesapeake Bay, USA, *Estuaries Coasts*, 41, 940–951,  
731 <https://doi.org/10.1007/s12237-017-0336-9>, 2018.

732 Sullivan, J. C., Torres, R., and Garrett, A.: Intertidal Creeks and Overmarsh Circulation in a Small  
 733 Salt Marsh Basin, *J. Geophys. Res. Earth Surf.*, 124, 447–463,  
 734 <https://doi.org/10.1029/2018JF004861>, 2019.

735 Teng, J., Vaze, J., Dutta, D., and Marvanek, S.: Rapid Inundation Modelling in Large Floodplains  
 736 Using LiDAR DEM, *Water Resour. Manag.*, 29, 2619–2636, [https://doi.org/10.1007/s11269-015-](https://doi.org/10.1007/s11269-015-0960-8)  
 737 0960-8, 2015.

738 Thomas, A., Dietrich, J., Asher, T., Bell, M., Blanton, B., Copeland, J., Cox, A., Dawson, C.,  
 739 Fleming, J., and Luettich, R.: Influence of storm timing and forward speed on tides and storm  
 740 surge during Hurricane Matthew, *Ocean Model.*, 137, 1–19,  
 741 <https://doi.org/10.1016/j.ocemod.2019.03.004>, 2019.

742 Wamsley, T. V., Cialone, M. A., Smith, J. M., Atkinson, J. H., and Rosati, J. D.: The potential of  
 743 wetlands in reducing storm surge, *Ocean Eng.*, 37, 59–68,  
 744 <https://doi.org/10.1016/j.oceaneng.2009.07.018>, 2010.

745 Williams, W. A., Jensen, M. E., Winne, J. C., and Redmond, R. L.: An Automated Technique for  
 746 Delineating and Characterizing Valley-Bottom Settings, in: *Monitoring Ecological Condition in*  
 747 *the Western United States: Proceedings of the Fourth Symposium on the Environmental*  
 748 *Monitoring and Assessment Program (EMAP), San Francisco, CA, April 6–8, 1999*, edited by:  
 749 Sandhu, S. S., Melzian, B. D., Long, E. R., Whitford, W. G., and Walton, B. T., Springer  
 750 Netherlands, Dordrecht, 105–114, [https://doi.org/10.1007/978-94-011-4343-1\\_10](https://doi.org/10.1007/978-94-011-4343-1_10), 2000.

751 Wing, O. E. J., Sampson, C. C., Bates, P. D., Quinn, N., Smith, A. M., and Neal, J. C.: A flood  
 752 inundation forecast of Hurricane Harvey using a continental-scale 2D hydrodynamic model, *J.*  
 753 *Hydrol. X*, 4, 100039, <https://doi.org/10.1016/j.hydroa.2019.100039>, 2019.

754 Wu, W., Zhou, Y., and Tian, B.: Coastal wetlands facing climate change and anthropogenic  
 755 activities: A remote sensing analysis and modelling application, *Ocean Coast. Manag.*, 138, 1–  
 756 10, <https://doi.org/10.1016/j.ocecoaman.2017.01.005>, 2017.

757 Zheng, X., Maidment, D. R., Tarboton, D. G., Liu, Y. Y., and Passalacqua, P.: GeoFlood: Large-  
 758 Scale Flood Inundation Mapping Based on High-Resolution Terrain Analysis, *Water Resour. Res.*,  
 759 54, 10,013–10,033, <https://doi.org/10.1029/2018WR023457>, 2018a.

760 Zheng, X., Tarboton, D. G., Maidment, D. R., Liu, Y. Y., and Passalacqua, P.: River Channel  
 761 Geometry and Rating Curve Estimation Using Height above the Nearest Drainage, *JAWRA J. Am.*  
 762 *Water Resour. Assoc.*, 54, 785–806, <https://doi.org/10.1111/1752-1688.12661>, 2018b.

763  
  
 764
